# Supplementary material
Source: PubMed Central journal article supplement (PMC4111374)
Supplement: jm5004864_si_001.pdf [file jm5004864_si_001.pdf]

# Supporting Information

## 2',6'-Dihalostyrylanilines, Pyridines and Pyrimidines for the Inhibition of the Catalytic Subunit of Methionine S-Adenosyltransferase-2 (MAT2A)

*Vitaliy M. Sviripa<sup>±§</sup>, Wen Zhang<sup>§†</sup>, Andrii G. Balia<sup>±§</sup>,*

*Oleg V. Tsodikov<sup>&</sup>, Justin R. Nickell<sup>&</sup>, Florence Gizard<sup>&</sup>, Tianxin Yu<sup>§†</sup>, Eun Y Lee<sup>†</sup>, Linda P. Dwoskin<sup>&</sup>,*

*Chunming Liu<sup>§†\*</sup> and David S. Watt<sup>±§†\*</sup>*

<sup>§</sup>Department of Molecular and Cellular Biochemistry, <sup>&</sup>Department of Pharmaceutical Sciences, College of Pharmacy, <sup>±</sup>Center for Pharmaceutical Research and Innovation, and <sup>†</sup>Markey Cancer Center, University of Kentucky, Lexington, KY 40506-0509

### Table of Contents

Figure 1S. Examples of IC<sub>50</sub> determination for cell proliferation assay.....Page S2

Figure S2. Effects of FIDAS agent on colon cancer (CRC) organoids.....Page S3

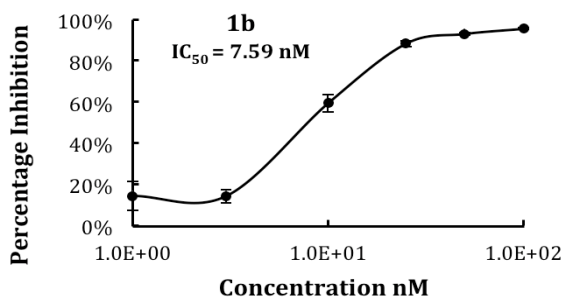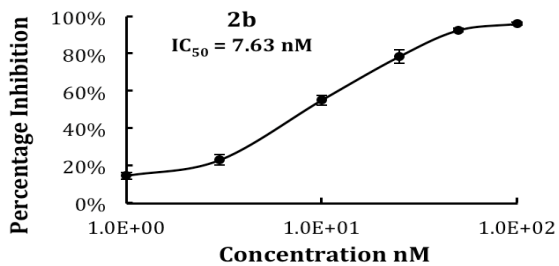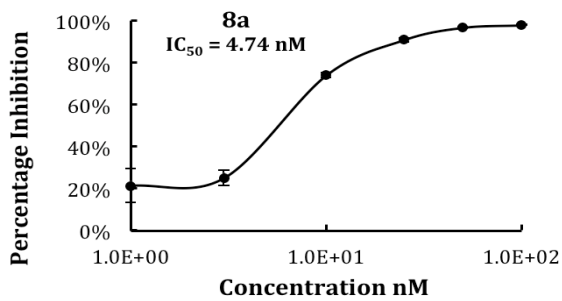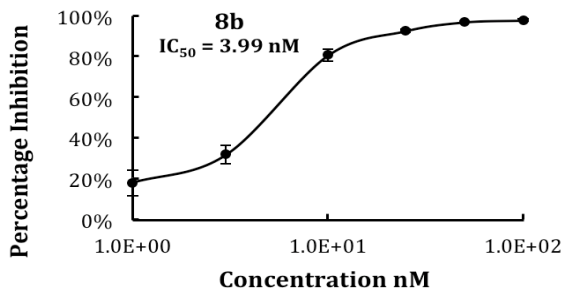

**Figure 1S.** Examples of  $IC_{50}$  determination for cell proliferation assay.

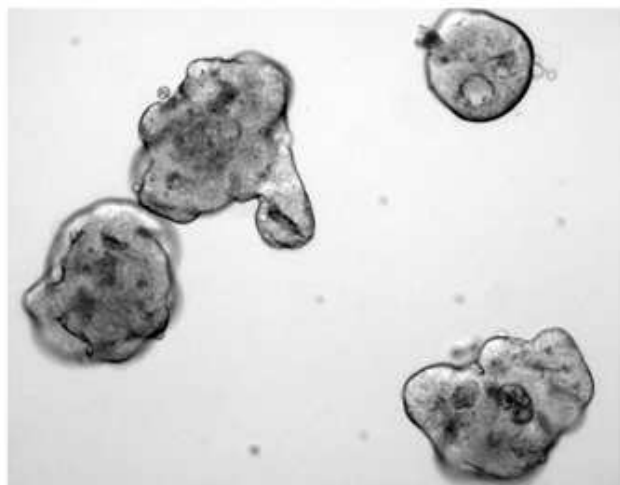

Panel A

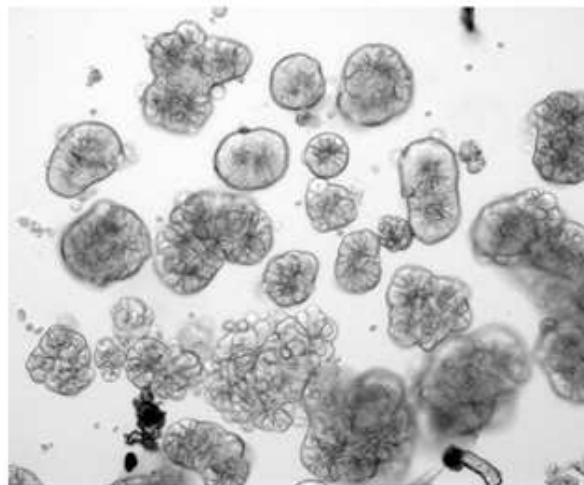

Panel B

**Figure S2. Effects of FIDAS agent on colon cancer (CRC) organoids.** CRC organoids isolated from CRC patients were cultured in stem cell medium (DMEM/F-12+GlutaMAX, 1x; hESC SFM Growth Supplement, 50x; 1.8% BSA; 8ng/mL FGF-basic; 55mM 2-Mercaptoethanol) and treated with DMSO (Panel A) or FIDAS **2b** (Panel B) for 6 days. FIDAS **2b** significantly inhibited the growth of CRC organoids (inhibited the formation and reduced the size of CRC organoid).
